# Supplementary material for: Adaptive Validation Design: A Bayesian Approach to Validation Substudy Design With Prospective Data Collection
Source: PubMed Central journal article supplement — Epidemiology. 2020 Jun 2;31(4):509–16. doi: 10.1097/EDE.0000000000001209 (PMC7269021; doi:10.1097/ede.0000000000001209), 2020-06-02

## Supplemental Digital Content:

Adaptive Validation Design: a Bayesian approach to validation substudy design with prospective data collection

**Author List:** Lindsay J. Collin,<sup>1</sup> Richard F. MacLehose,<sup>2</sup> Thomas P. Ahern,<sup>3</sup> Rebecca Nash,<sup>1</sup> Darios Getahun,<sup>4</sup> Douglas Roblin,<sup>5</sup> Michael J. Silverberg,<sup>6</sup> Michael Goodman,<sup>1</sup> Timothy L. Lash<sup>1</sup>

**eFigure 1.** Single person validation among the complete STRONG youth cohort for the A) PPV and B) NPV.

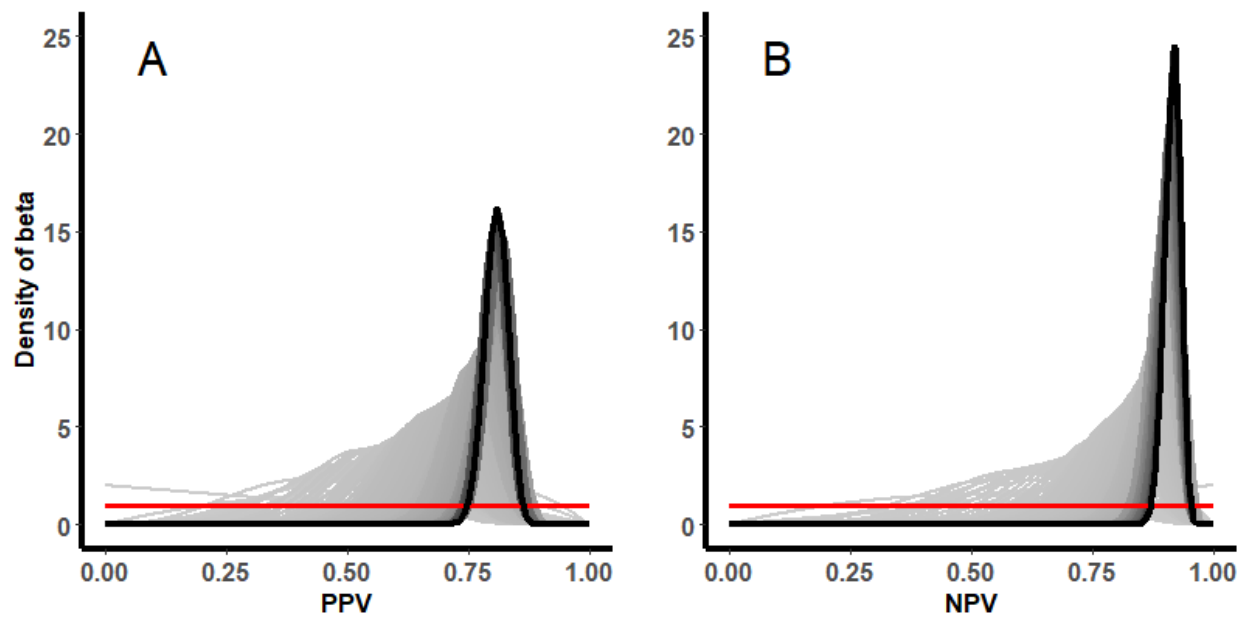

Supplement: ede-31-509-s001.pdf [file ede-31-509-s001.pdf]
